# Annals of Oncology

Official Journal of the  
European Society for Medical Oncology

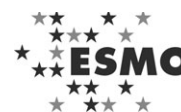

## Volume 18, 2007 Supplement 1

Hematology for the Medical Oncologist

### chapters

|                                                                                                     |     |                                                                                              |     |
|-----------------------------------------------------------------------------------------------------|-----|----------------------------------------------------------------------------------------------|-----|
| Epidemiology of hematological malignancies<br><i>D. Rodriguez-Abreu, A. Bordonni &amp; E. Zucca</i> | i3  | Response evaluation and long-term follow-up<br><i>H. C. Schouten</i>                         | i33 |
| Normal and malignant hematopoiesis<br><i>M. F. Fey</i>                                              | i9  | Supportive care<br><i>H. Ludwig &amp; N. Zojer</i>                                           | i37 |
| Clinical signs and symptoms at diagnosis and its differential diagnosis<br><i>H. Mellstedt</i>      | i14 | Hematological emergencies<br><i>N. Zojer &amp; H. Ludwig</i>                                 | i45 |
| Diagnosis, staging and prognostic factors<br><i>H. C. Schouten</i>                                  | i22 | Management of elderly patients with hematological neoplasms<br><i>O. Mora &amp; E. Zucca</i> | i49 |
| General principles of treatment<br><i>H. C. Schouten</i>                                            | i29 | Salient features of hematological diseases<br><i>M. F. Fey</i>                               | i54 |
